# Noble Path to Oblivion

## Molecular and Neurophysiological Mechanisms of Xenon

George A. Mashour, M.D., Ph.D.

**F**OR chemists and physicists, xenon is a noble gas with 54 protons and low reactivity (or “inert”) due to an outer shell that is replete with electrons. For anesthesiologists, xenon is a drug with remarkable properties as a fast-acting anesthetic, analgesic, cardioprotectant, and neuroprotectant.<sup>1,2</sup> But how does it work? In this issue of *ANESTHESIOLOGY*, Mattusch *et al.*<sup>3</sup> report an impressive study that provides insight into the molecular and neurophysiological mechanisms of xenon.

### Mechanisms of the “Black Sheep” Anesthetics: A Shift from Excitatory Receptors to Pacemaker Channels

Xenon is often considered to be one of the “black sheep” anesthetics, which differ from their siblings in more common clinical use. Xenon, ketamine, and nitrous oxide do not have high affinity for the  $\gamma$ -aminobutyric acid receptor but rather antagonize receptors of the excitatory neurotransmitter glutamate.<sup>4</sup> Nitrous oxide<sup>5</sup> and ketamine<sup>6</sup> have been shown to block the *N*-methyl-D-aspartate type receptor for glutamate; xenon also antagonizes non-*N*-methyl-D-aspartate glutamatergic receptors.<sup>7,8</sup> In the past half decade, several key studies have suggested that the hyperpolarization-activated cyclic nucleotide-gated (HCN)-1 channel may be the molecular target that is responsible for ketamine-induced unconsciousness.<sup>9,10</sup> HCN channels have sometimes been referred to as “pacemaker channels” in the brain that generate rhythmic activity (among other important functions)<sup>11</sup>—thus, it is not difficult to imagine how modulation of such channels by certain anesthetics could lead to a cerebral “arrhythmia” that perturbs consciousness. Of course, the effects would be expected to vary with the neural expression pattern of the channel. Messenger

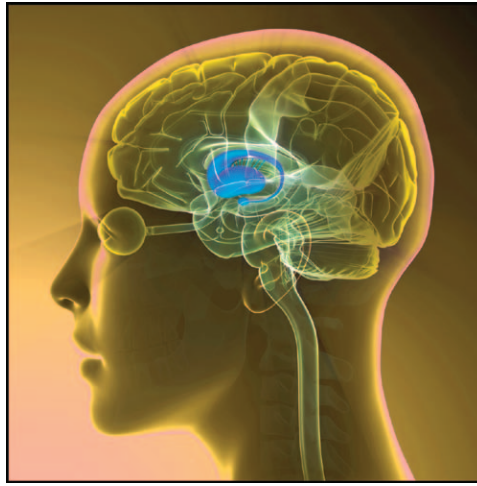

*“... it is not difficult to imagine how modulation of [thalamic pacemaker] channels by certain anesthetics could lead to a cerebral ‘arrhythmia’ that perturbs consciousness.”*

thalamic stimulation. However, xenon had no significant effect in blunting thalamocortical signal propagation in slices extracted from mice with a complete absence of the HCN2 gene. Thus, HCN2 channels were a necessary ingredient for the effects of xenon in the model of thalamocortical function used by the authors. Importantly, the authors found that HCN2 channel “knock-out” mice (*i.e.*, mice lacking the HCN2 gene) were relatively insensitive to the sedative effects of xenon *in vivo*, confirming relevance in an intact mammalian organism. Although these experiments do not constitute direct proof that the HCN2 channel is the critical target mediating xenon-induced unconsciousness, the data support the hypothesis that xenon’s neurophysiological effects on the thalamocortical system—and the behavioral effects of sedation—are mediated by HCN2 channels. This work, in conjunction with past studies of ketamine, suggests that the focus of mechanistic research on this group

RNA encoding HCN1 channels is expressed in a number of areas relevant to the effects of anesthetics: neocortex (important for conscious experience), hippocampus (important for memory), and reticular system in the brainstem (important for arousal).<sup>12</sup> HCN2 channels are expressed more widely but have high expression in both sensory and higher-order nuclei of the thalamus.<sup>12</sup>

The HCN2 channel was the focus of the work by Mattusch *et al.* The investigators found that xenon impaired thalamocortical signal propagation and that the disruption was specifically mediated by HCN2 channels. To demonstrate this, they extracted thalamocortical slices from mice and tested how xenon affected neuronal signaling after electrically stimulating the thalamus. Voltage-sensitive dye imaging revealed (in living color—see fig. 1B of the article) that xenon reduced the cortical response to

Image: ©Thinkstock.

Corresponding article on page 1047.

Accepted for publication December 23, 2014. From the Department of Anesthesiology, Neuroscience Graduate Program, Center for Consciousness Science, University of Michigan Medical School, Ann Arbor, Michigan.

Copyright © 2015, the American Society of Anesthesiologists, Inc. Wolters Kluwer Health, Inc. All Rights Reserved. *Anesthesiology* 2015; 122:971-3

of anesthetics may be shifting from glutamate receptors to pacemaker channels in the brain.

### Anesthetic-induced Unconsciousness and the Thalamocortical System

The role of the thalamus in anesthetic-induced unconsciousness has been an intense and dynamic area of research for decades. The attention is warranted: the thalamus is critical to cortical function (both sensory processing and integration) and is depressed by virtually all anesthetics and sedative-hypnotics (with the notable exception of ketamine<sup>13</sup>). Although the literature is too extensive and diverse to review in an editorial, there are several possibilities (not all mutually exclusive) for the mechanistic role of the thalamus in general anesthesia.

- The thalamus may be a *switch* that, as with sleep, can be “turned off” to depress the cortex and disrupt consciousness.<sup>14</sup>
- The thalamus, which receives major afferent input from the cortex, may be a *read-out* for what is primarily a cortical depression during general anesthesia.<sup>15</sup>
- The thalamus may be a *participant* in anesthetic-induced unconsciousness by hypersynchronizing with the frontal cortex and reducing the normally flexible repertoire of corticocortical or thalamocortical signaling.<sup>16,17</sup>
- Depression of the thalamus may be *epiphenomenal* rather than a state-specific effect associated with anesthetic-induced unconsciousness.<sup>18</sup>

It is important to draw a distinction between sensory and higher-order thalamocortical interactions. In simplistic terms, sensory nuclei receive input from the periphery and project to primary sensory cortex, whereas higher-order nuclei receive input from the cortex and facilitate corticocortical interactions.<sup>19</sup> A functional magnetic resonance imaging study in humans demonstrated that the effects of propofol on higher-order thalamic nuclei were more pronounced than on sensory nuclei and better accounted for the cognitive changes observed during drug exposure.<sup>20</sup> These data support the interpretation that the key action of anesthetics on the thalamus relates to the higher-order nuclei that facilitate broader cortical integration rather than the suppression of first-order sensory signaling from the thalamus to the cortex.

Two recent studies in animals also support this interpretation. Raz *et al.*<sup>21</sup> compared the effects of isoflurane on a sensory thalamocortical pathway (from the medial geniculate nucleus to the primary auditory cortex) *versus* a corticocortical pathway (from the visual cortex to the primary auditory cortex). A more marked effect was found on the corticocortical pathway, but it was unclear from this study whether this resulted from a direct corticocortical disruption or whether the breakdown of multisensory integration was occurring through higher-order thalamic nuclei. Baker *et al.*<sup>22</sup> compared neurophysiological changes in sensory

thalamus, higher-order thalamus (central medial nucleus), and associated cortical areas. Their study suggested that the effects of propofol are mediated through higher-order nuclei of the thalamus rather than sensory nuclei.

So, where does the investigation of Mattusch *et al.* fit into this complex picture? Surprisingly, it adds a twist to what seemed like a consistent story. The thalamocortical breakdown attributed to xenon was observed with a first-order sensory pathway from thalamus to cortex, contrary to what we would expect from the collective work of Raz *et al.* and Baker *et al.*, as well as neuroimaging studies in humans reporting relatively intact sensory thalamocortical networks during propofol-induced unconsciousness.<sup>23</sup> This raises the possibility that the role of the thalamus in anesthetic-induced unconsciousness is drug specific and that no generalizable thalamocortical mechanism can be asserted. However, alternative hypotheses related to corticocortical or higher-order thalamocortical interactions were not explored.

### Conclusion

The study of Mattusch *et al.* advances our understanding by highlighting the importance of HCN2 channels as (1) molecular targets for xenon, (2) mediators of disruptive effect of xenon on thalamocortical signal propagation *in vitro*, and (3) mediators of sedative effects of xenon *in vivo*. Furthermore, the data reveal the complexity of influences that general anesthetics may have on the thalamus. Suffice it to say, future research focusing on this noble path to oblivion will be anything but inert.

### Competing Interests

The author is not supported by, nor maintains any financial interest in, any commercial activity that may be associated with the topic of this article.

### Correspondence

Address correspondence to Dr. Mashour: gmashour@umich.edu

### References

1. Preckel B, Weber NC, Sanders RD, Maze M, Schlack W: Molecular mechanisms transducing the anesthetic, analgesic, and organ-protective actions of xenon. *ANESTHESIOLOGY* 2006; 105:187–97
2. Dickinson R, Franks NP: Bench-to bedside review: Molecular pharmacology and clinical use of inert gases in anesthesia and neuroprotection. *Crit Care* 2010; 14:229
3. Mattusch C, Kratzer S, Buerge M, Kreuzer M, Engel T, Kopp C, Biel M, Hammelmann V, Ying S-W, Goldstein PA, Kochs E, Haseneder R, Rammes G: Impact of hyperpolarization-activated, cyclic nucleotide-gated cation channel type 2 for the xenon-mediated anesthetic effect: Evidence from *in vitro* and *in vivo* experiments. *ANESTHESIOLOGY* 2015; 122:1047–59
4. Solt K, Forman SA: Correlating the clinical actions and molecular mechanisms of general anesthetics. *Curr Opin Anaesthesiol* 2007; 20:300–6

5. Jevtović-Todorović V, Todorović SM, Mennerick S, Powell S, Dikranian K, Benshoff N, Zorumski CF, Olney JW: Nitrous oxide (laughing gas) is an NMDA antagonist, neuroprotectant and neurotoxin. *Nat Med* 1998; 4:460–3
6. Anis NA, Berry SC, Burton NR, Lodge D: The dissociative anaesthetics, ketamine and phencyclidine, selectively reduce excitation of central mammalian neurones by *N*-methyl-aspartate. *Br J Pharmacol* 1983; 79:565–75
7. Nagele P, Metz LB, Crowder CM: Xenon acts by inhibition of non-*N*-methyl-*D*-aspartate receptor-mediated glutamatergic neurotransmission in *Caenorhabditis elegans*. *ANESTHESIOLOGY* 2005; 103:508–13
8. Haseneder R, Kratzer S, Kochs E, Eckle VS, Zieglgänsberger W, Rammes G: Xenon reduces *N*-methyl-*D*-aspartate and alpha-amino-3-hydroxy-5-methyl-4-isoxazolepropionic acid receptor-mediated synaptic transmission in the amygdala. *ANESTHESIOLOGY* 2008; 109:998–1006
9. Chen X, Shu S, Bayliss DA: HCN1 channel subunits are a molecular substrate for hypnotic actions of ketamine. *J Neurosci* 2009; 29:600–9
10. Zhou C, Douglas JE, Kumar NN, Shu S, Bayliss DA, Chen X: Forebrain HCN1 channels contribute to hypnotic actions of ketamine. *ANESTHESIOLOGY* 2013; 118:785–95
11. Benarroch EE: HCN channels: Function and clinical implications. *Neurology* 2013; 80:304–10
12. Santoro B, Chen S, Luthi A, Pavlidis P, Shumyatsky GP, Tibbs GR, Siegelbaum SA: Molecular and functional heterogeneity of hyperpolarization-activated pacemaker channels in the mouse CNS. *J Neurosci* 2000; 20:5264–75
13. Långsjö JW, Maksimow A, Salmi E, Kaisti K, Aalto S, Oikonen V, Hinkka S, Aantaa R, Sipilä H, Viljanen T, Parkkola R, Scheinin H: S-ketamine anesthesia increases cerebral blood flow in excess of the metabolic needs in humans. *ANESTHESIOLOGY* 2005; 103:258–68
14. Alkire MT, Haier RJ, Fallon JH: Toward a unified theory of narcosis: Brain imaging evidence for a thalamocortical switch as the neurophysiologic basis of anesthetic-induced unconsciousness. *Conscious Cogn* 2000; 9:370–86
15. Velly LJ, Rey MF, Bruder NJ, Gouvitsos FA, Witjas T, Regis JM, Peragut JC, Gouin FM: Differential dynamic of action on cortical and subcortical structures of anesthetic agents during induction of anesthesia. *ANESTHESIOLOGY* 2007; 107:202–12
16. Ching S, Cimenser A, Purdon PL, Brown EN, Kopell NJ: Thalamocortical model for a propofol-induced alpha-rhythm associated with loss of consciousness. *Proc Natl Acad Sci U S A* 2010; 107:22665–70
17. Supp GG, Siegel M, Hipp JF, Engel AK: Cortical hypersynchrony predicts breakdown of sensory processing during loss of consciousness. *Curr Biol* 2011; 21:1988–93
18. Monti MM, Lutkenhoff ES, Rubinov M, Boveroux P, Vanhauzenhuysse A, Gosseries O, Bruno MA, Noirhomme Q, Boly M, Laureys S: Dynamic change of global and local information processing in propofol-induced loss and recovery of consciousness. *PLoS Comput Biol* 2013; 9:e1003271
19. Saalman YB: Intralaminar and medial thalamic influence on cortical synchrony, information transmission and cognition. *Front Syst Neurosci* 2014; 8:83
20. Liu X, Lauer KK, Ward BD, Li SJ, Hudetz AG: Differential effects of deep sedation with propofol on the specific and nonspecific thalamocortical systems: A functional magnetic resonance imaging study. *ANESTHESIOLOGY* 2013; 118:59–69
21. Raz A, Grady SM, Krause BM, Uhlrich DJ, Manning KA, Banks MI: Preferential effect of isoflurane on top-down *vs.* bottom-up pathways in sensory cortex. *Front Syst Neurosci* 2014; 8:191
22. Baker R, Gent TC, Yang Q, Parker S, Vyssotski AL, Wisden W, Brickley SG, Franks NP: Altered activity in the central medial thalamus precedes changes in the neocortex during transitions into both sleep and propofol anesthesia. *J Neurosci* 2014; 34:13326–35
23. Boveroux P, Vanhauzenhuysse A, Bruno MA, Noirhomme Q, Lauwick S, Luxen A, Degueldre C, Plenevaux A, Schnakers C, Phillips C, Brichant JF, Bonhomme V, Maquet P, Greicius MD, Laureys S, Boly M: Breakdown of within- and between-network resting state functional magnetic resonance imaging connectivity during propofol-induced loss of consciousness. *ANESTHESIOLOGY* 2010; 113:1038–53
